# Supplementary material for: The Influence of Family Socioeconomic Status on Primary School Students’ Emotional Intelligence: The Mediating Effect of Parenting Styles and Regional Differences
Source: Front Psychol. 2022 Feb 21;13:753774. doi: 10.3389/fpsyg.2022.753774 (PMC8901077; doi:10.3389/fpsyg.2022.753774)
Supplement: Supplementary file 2 [file Data_Sheet_2.csv]

Q11	Q12	Q13��1��Ů2��	Q14	Q15	Q16	Q17	Q18	Q19	Q21	Q22	Q23	Q24	Q25	Q26	Q27	Q28	Q29	Q210	Q211	Q212	Q213	Q214	Q215	Q216	Q217	Q218	Q219	Q220	Q221	Q222	Q223	Q31F	Q31M	Q32F	Q32M	Q34F	Q34M	Q35F	Q35M	Q36F	Q36M	Q37F	Q37M	Q39F	Q39M	Q310F	Q310M	Q311F	Q311M
11	5	2	3	3	3	3	7	2	4	4	3	3	3	3	3	3	2	1	2	5	2	5	5	5	5	5	3	3	3	3	3	2	4	1	4	1	4	2	1	2	4	4	4	2	2	3	2	1	4
10	5	2	4	3	3	3	9	3	5	5	5	3	1	5	4	2	5	3	2	5	5	5	5	5	5	5	5	5	5	5	5	1	1	4	4	1	1	3	3	3	3	2	2	4	3	2	4	2	3
12	5	1	3	3	3	3	8	4	3	3	3	4	5	5	5	5	5	5	5	5	5	3	1	2	1	5	5	5	5	5	5	3	3	4	4	2	2	4	4	3	3	3	3	1	1	4	4	1	1
10	5	1	4	4	3	3	11	3	2	4	0	2	2	3	3	3	3	3	3	2	5	3	3	4	3	1	1	1	1	2	2	4	4	3	3	2	2	4	4	3	3	1	1	1	1	4	4	3	3
10	5	2	1	1	3	2	9	3	5	5	4	3	4	5	4	5	5	5	5	5	5	5	3	4	4	4	4	4	4	4	4	1	1	4	4	3	4	1	1	3	3	3	3	4	4	1	1	1	1
11	5	1	3	4	3	4	9	4	2	4	2	3	2	5	5	3	4	5	5	1	4	4	4	5	2	4	2	2	2	4	3	3	2	3	4	2	2	2	1	4	4	4	4	2	4	3	3	2	2
11	5	1	2	3	3	3	6	3	5	5	3	3	1	1	1	5	2	2	3	1	5	1	3	3	4	3	3	3	3	3	1	3	3	2	2	2	2	4	4	3	3	2	2	1	1	4	4	2	2
11	5	2	3	4	3	4	10	4	4	4	5	5	5	5	4	4	4	5	5	4	5	4	4	4	3	4	5	5	5	4	4	1	2	3	4	4	4	2	2	3	4	3	2	4	4	1	1	1	2
11	5	2	2	3	3	3	8	3	4	3	3	3	3	4	2	5	4	3	4	4	4	5	5	4	2	3	3	4	4	3	3	2	2	4	4	4	4	1	1	2	3	4	4	3	3	2	2	1	1
10	5	2	3	4	4	3	9	3	3	4	3	3	4	5	4	4	3	3	4	3	4	3	3	3	3	4	2	3	2	3	3	3	2	4	4	3	4	2	2	3	3	3	2	3	3	3	2	1	1
11	5	2	2	2	3	3	8	3	5	5	5	3	4	5	5	4	5	4	4	2	4	4	3	4	3	5	5	5	5	4	4	1	2	2	2	2	2	1	1	2	2	4	4	3	3	1	2	1	2
11	5	1	3	4	4	4	11	0	5	5	5	5	5	5	5	5	5	5	5	5	5	5	5	5	5	5	5	5	5	5	5	2	3	4	4	4	4	1	1	1	4	3	1	4	1	1	4	1	4
11	5	1	4	4	3	4	10	5	4	3	4	5	5	5	5	5	5	5	5	4	5	3	3	3	2	4	4	5	5	4	5	1	1	3	3	4	4	1	1	3	3	3	3	4	4	3	3	2	2
11	5	1	3	3	3	3	6	4	5	5	5	5	3	4	5	5	4	4	5	5	5	5	5	4	3	4	5	5	5	4	5	2	1	4	4	4	4	1	1	4	4	3	3	4	4	1	1	1	4
11	5	2	4	4	3	2	12	3	4	5	5	5	4	3	3	4	3	4	4	3	3	3	3	3	2	3	5	4	5	5	5	1	1	4	4	4	4	1	1	2	2	2	2	3	3	1	1	1	1
11	5	2	5	4	4	4	11	4	3	5	3	4	5	4	5	3	4	3	4	5	4	3	3	3	4	3	5	4	5	4	3	2	2	3	2	2	2	2	2	3	3	3	3	2	2	2	2	2	2
10	5	1	3	3	4	3	8	3	4	4	5	5	4	4	5	5	5	5	4	3	4	3	4	3	3	4	4	4	4	4	4	1	1	4	4	4	4	1	1	4	4	3	3	3	3	1	1	1	1
11	5	1	4	4	4	4	11	4	4	4	5	4	5	5	5	5	5	5	5	5	5	5	4	5	4	5	5	5	4	5	5	2	2	4	4	4	4	1	1	4	4	4	4	4	4	2	2	3	3
10	5	1	3	3	3	3	12	3	5	3	3	4	2	4	4	4	4	4	5	1	4	5	5	5	5	5	5	4	5	3	5	3	3	4	4	4	4	1	1	2	3	2	2	4	4	3	2	4	4
11	5	2	4	4	0	0	11	5	4	4	4	4	5	5	5	4	5	5	5	3	5	5	5	5	4	4	4	4	4	5	5	2	2	4	4	4	4	1	2	4	4	2	2	2	2	2	3	1	2
10	5	2	4	4	3	3	6	4	4	5	5	4	4	4	5	5	5	5	4	4	4	5	3	4	3	4	5	4	5	5	4	1	1	3	3	3	3	1	1	3	3	2	2	3	3	1	1	1	1
10	5	1	1	1	4	5	12	3	5	4	4	5	5	5	5	4	4	3	4	2	5	4	5	5	5	4	4	3	4	5	3	1	3	2	3	3	4	2	3	4	4	2	3	1	3	2	4	1	4
11	5	2	4	3	4	4	12	3	4	4	4	4	4	5	5	5	5	5	5	4	5	4	3	3	2	5	5	5	5	4	5	1	4	4	4	3	3	2	2	4	4	4	4	4	4	4	4	2	2
10	5	1	2	3	1	1	6	3	3	4	5	2	5	2	2	0	3	1	2	2	2	1	2	2	3	2	1	1	2	5	1	2	2	4	4	4	4	1	1	4	4	2	2	0	4	4	0	1	1
11	5	1	1	1	4	4	9	3	3	3	3	3	3	5	5	5	5	5	5	5	5	1	1	2	1	1	3	3	3	3	3	2	2	2	2	2	2	2	2	2	2	2	2	2	2	2	2	2	2
10	5	2	2	3	3	3	4	3	3	5	5	5	5	1	5	1	5	5	5	1	3	5	3	3	5	5	5	5	5	5	5	1	1	4	4	1	1	4	4	4	4	4	4	4	4	1	1	0	4
10	5	1	5	4	4	5	11	3	5	5	5	4	4	5	4	5	5	5	5	5	5	4	4	3	2	4	4	4	4	5	5	2	2	4	4	4	4	1	1	2	2	4	4	4	4	1	1	2	2
10	5	2	5	4	4	4	11	5	3	4	3	3	2	5	5	5	5	4	5	3	5	3	3	3	3	3	3	3	3	3	3	1	1	3	3	4	4	1	1	2	2	3	3	4	4	1	1	1	1
10	5	1	4	4	4	4	9	3	1	5	5	4	5	5	4	5	5	5	4	5	2	0	5	5	5	5	3	5	5	5	5	1	1	4	4	4	4	2	2	1	1	4	4	4	4	1	1	2	2
11	5	2	3	4	3	4	9	4	5	5	5	5	5	4	5	4	5	4	5	5	5	3	3	4	2	5	5	4	5	5	4	1	1	4	4	4	4	1	1	4	4	2	2	4	4	1	1	1	1
10	5	1	3	1	2	2	9	3	3	4	3	4	3	5	5	4	4	4	4	3	5	4	4	4	3	3	3	3	3	5	4	1	1	3	2	3	3	1	1	3	3	3	3	4	4	2	2	1	2
12	5	1	3	1	4	2	12	5	4	4	4	4	5	4	4	5	5	3	3	3	3	5	5	5	5	4	4	4	4	5	5	2	2	4	4	4	4	2	2	3	3	3	3	4	4	2	2	2	1
11	5	1	2	2	3	3	8	5	3	3	3	3	3	5	5	4	5	4	5	5	5	4	4	3	3	3	5	5	5	5	5	1	1	4	4	4	4	1	1	1	1	1	1	2	2	1	1	1	1
11	5	1	2	4	4	5	10	3	4	5	5	4	3	2	3	2	4	5	4	1	4	5	2	2	3	0	5	3	3	4	4	1	2	4	2	3	2	1	3	2	1	4	4	4	3	1	3	1	4
11	5	2	3	3	2	2	12	4	3	3	4	3	3	4	3	3	3	4	3	2	5	4	3	3	2	4	4	4	3	4	4	1	1	2	2	4	4	2	2	3	3	2	2	4	4	2	3	1	2
11	5	1	4	2	3	2	8	3	2	4	2	2	3	4	3	2	1	3	3	4	1	5	4	4	2	3	2	2	1	1	2	4	2	1	4	1	3	4	2	4	2	3	4	3	4	4	2	1	2
11	5	1	2	2	3	2	9	2	4	5	5	3	5	4	5	5	5	5	5	3	5	4	3	5	2	5	5	5	5	5	5	2	3	3	3	3	3	2	1	3	3	2	2	3	4	2	2	2	4
11	5	1	3	3	4	4	9	4	4	4	5	0	3	4	4	4	3	5	4	2	5	4	3	3	3	5	2	5	2	4	4	1	1	4	4	4	4	1	1	3	3	4	4	4	4	1	1	2	2
11	5	1	4	4	4	4	10	4	4	5	3	3	2	4	3	4	4	4	4	3	4	5	5	5	4	3	2	2	2	3	3	4	4	3	2	4	3	3	4	4	4	4	4	2	3	4	4	3	4
11	5	2	4	4	4	4	11	5	5	5	5	5	5	5	5	5	5	5	5	5	5	5	5	5	5	5	5	5	5	5	5	1	1	4	4	4	4	2	2	3	3	2	2	4	4	2	2	1	4
10	5	1	4	5	4	4	11	5	3	4	2	2	2	4	3	2	5	4	3	1	4	5	1	4	4	3	2	1	3	4	3	2	1	3	2	3	3	2	1	3	2	2	3	3	2	2	1	3	1
11	5	1	1	3	3	3	5	3	4	4	4	3	5	5	4	5	5	4	4	5	5	3	3	3	4	4	5	4	5	5	5	2	1	3	4	4	4	2	1	4	4	4	4	3	3	2	2	4	4
11	5	2	3	1	3	3	10	3	4	5	3	4	4	5	5	5	4	5	5	5	5	4	4	3	3	5	4	4	4	5	5	2	3	4	4	3	4	3	3	4	4	3	3	4	4	3	3	1	1
11	5	1	2	2	3	3	12	4	2	2	2	2	2	4	4	5	3	3	4	5	5	4	4	4	3	3	2	4	4	3	5	2	2	2	3	2	2	3	2	3	3	2	3	3	4	3	2	1	3
10	5	1	4	3	4	4	9	3	5	5	5	5	5	5	5	5	5	5	5	4	5	4	5	4	4	4	4	5	4	5	4	2	2	4	4	4	4	2	1	2	3	1	1	3	3	2	1	1	1
11	5	1	4	5	4	4	9	4	5	5	4	3	5	5	5	5	3	5	4	2	5	4	4	5	3	5	4	5	5	5	4	3	4	4	4	4	4	2	1	4	4	3	4	4	4	2	2	2	4
11	5	2	3	3	3	3	8	5	4	5	5	5	5	5	4	5	5	5	5	5	4	5	5	5	3	5	4	5	5	4	5	1	1	2	2	3	3	2	2	1	1	4	4	3	3	3	1	1	1
11	5	2	4	1	3	4	12	4	5	5	5	4	4	5	5	5	4	4	5	4	5	3	4	4	5	4	4	5	5	5	4	2	2	4	4	4	4	2	2	4	4	4	3	4	4	3	2	3	3
11	5	1	4	3	4	3	12	5	4	5	5	3	2	5	5	3	4	5	4	5	4	5	5	5	5	5	5	5	4	5	5	2	1	4	4	4	4	2	3	4	4	4	4	2	2	4	2	4	4
11	5	2	4	1	2	2	9	4	5	5	4	4	4	5	4	5	5	5	5	4	4	3	3	4	3	3	4	4	5	5	5	2	2	4	4	4	4	2	1	3	2	4	4	3	4	2	1	1	2
11	5	1	4	4	4	4	5	3	4	5	4	4	3	5	5	5	5	4	5	1	5	4	3	5	1	4	3	4	4	5	3	3	2	2	2	2	2	3	3	1	1	2	2	1	3	4	2	1	4
11	5	2	4	1	3	3	12	4	4	5	4	2	4	5	5	5	5	5	5	4	5	4	4	5	4	4	3	4	3	5	4	1	2	3	3	4	4	2	2	4	4	4	4	4	4	2	2	1	1
11	5	2	4	4	4	4	11	3	5	4	4	2	5	5	4	4	4	5	5	1	3	5	4	4	5	4	5	5	5	5	5	2	4	4	2	3	2	1	1	4	4	4	3	4	3	1	4	2	4
11	5	2	3	3	3	3	8	4	5	5	5	4	4	5	5	5	5	5	5	4	5	4	4	5	3	4	5	5	5	4	5	1	2	4	4	4	4	2	2	4	4	4	4	4	4	2	2	1	1
11	5	2	4	4	3	3	8	4	3	3	5	5	5	4	4	3	4	3	5	5	4	4	4	3	2	5	5	4	5	4	5	3	3	4	4	4	1	4	4	3	4	4	4	2	1	2	1	4	4
11	5	2	3	4	3	3	8	4	5	5	5	5	5	5	5	5	5	5	5	5	5	5	5	5	5	5	5	5	5	5	5	3	3	4	4	4	4	2	2	1	1	3	3	4	4	1	2	3	4
10	5	2	3	3	3	3	7	3	4	4	5	4	4	5	5	5	5	5	5	3	5	3	3	3	3	3	6	6	6	6	6	1	2	1	1	1	1	2	2	2	2	2	2	2	2	1	1	1	1
12	5	1	3	4	3	4	12	3	5	5	5	5	5	5	5	5	5	5	5	5	5	5	5	5	4	5	5	5	5	5	5	1	3	4	4	4	4	3	3	4	4	4	1	4	2	1	1	1	4
11	5	1	3	3	2	3	9	3	5	5	5	5	3	5	5	5	5	5	5	1	5	5	5	5	5	5	5	5	5	5	5	2	2	4	4	4	4	1	1	4	4	4	4	4	4	1	1	1	1
11	5	1	3	3	4	4	8	3	5	5	5	5	5	4	3	5	4	5	5	5	5	5	5	5	2	5	4	5	5	3	5	1	1	4	4	4	4	1	1	4	4	4	4	4	4	1	1	1	1
11	5	2	1	1	3	1	10	2	5	5	4	5	4	5	5	5	4	5	5	3	5	5	5	5	4	5	5	4	5	5	5	1	2	3	3	4	4	2	2	3	3	4	3	4	3	1	2	1	1
11	5	1	4	3	3	4	12	5	5	5	5	5	5	5	5	5	5	5	5	5	5	5	5	5	5	5	5	5	5	5	5	1	1	4	4	4	4	3	1	1	1	1	1	1	1	1	2	1	1
11	5	1	2	4	3	3	12	4	5	5	4	5	4	5	5	5	5	5	5	5	5	4	5	4	4	5	5	5	5	5	5	2	3	4	3	4	4	4	4	4	4	2	3	1	1	1	1	2	2
11	5	2	4	4	4	4	11	4	4	5	5	5	3	4	3	5	5	5	4	5	0	4	5	5	4	3	4	5	4	4	4	2	3	4	4	4	4	1	2	3	4	4	4	4	2	1	3	1	1
10	5	1	3	4	4	4	9	3	4	5	4	4	3	4	3	5	4	4	4	4	5	5	4	4	3	4	4	5	4	5	4	3	3	4	4	3	3	1	2	3	3	3	3	4	4	1	2	3	3
10	3	1	0	0	0	0	8	4	5	5	5	5	3	5	5	5	5	5	5	3	5	5	5	5	4	3	5	5	5	5	4	1	1	4	4	4	4	1	1	3	3	1	1	4	4	4	2	1	4
8	3	2	3	5	2	4	11	4	1	5	5	1	1	4	1	1	1	5	5	5	5	5	5	5	1	5	5	5	5	5	5	4	1	1	4	4	4	1	1	1	1	4	4	1	4	2	1	3	1
11	4	2	4	1	4	3	10	3	5	5	5	3	5	3	5	5	5	3	3	5	3	3	3	3	3	3	5	5	5	5	5	1	1	4	4	4	4	2	2	4	4	4	4	4	4	2	2	3	3
11	4	2	4	4	4	4	10	5	4	5	5	4	4	4	5	5	5	5	5	4	4	4	3	4	3	4	5	5	5	4	4	2	2	3	4	4	4	2	2	3	3	2	1	4	3	2	1	1	3
11	4	2	4	1	4	4	7	4	5	5	5	4	3	5	5	5	5	5	5	5	5	4	4	5	3	5	4	5	4	5	5	2	2	3	3	4	4	2	2	2	2	1	1	4	4	3	3	1	1
11	4	2	3	1	3	3	7	3	3	3	3	2	4	4	3	3	3	3	3	3	3	3	2	2	2	2	3	3	3	3	2	2	2	2	2	2	2	3	2	2	2	3	3	2	3	3	2	3	3
10	4	1	4	3	5	4	11	4	4	5	4	5	5	4	4	5	4	4	4	3	4	3	3	4	3	5	3	5	4	5	4	1	1	4	4	4	4	4	3	4	4	1	1	4	4	2	1	3	4
11	4	2	4	5	3	4	11	4	4	4	5	4	5	5	5	5	5	5	5	4	5	4	3	4	3	5	5	5	5	5	5	1	1	4	4	4	4	1	1	4	4	1	1	3	3	2	1	1	2
10	4	1	1	4	1	1	7	3	4	5	3	4	4	5	2	0	4	4	5	4	5	3	3	3	4	4	4	5	5	5	4	2	2	3	3	2	2	3	3	2	2	3	3	3	3	3	3	2	2
9	4	2	3	3	3	4	10	3	3	3	3	2	3	4	4	4	3	3	4	5	4	3	3	3	3	2	3	3	3	4	3	2	2	2	2	3	3	2	1	1	1	1	1	1	1	2	2	1	2
10	3	1	3	3	3	3	8	53	4	5	3	2	5	3	3	2	3	2	3	1	5	1	1	3	2	3	2	1	1	3	2		1	1		1	1	3	2			2	2	1	1		2	2
9	3	2	4	3	4	4	8	4	3	5	5	5	4	5	4	4	5	4	4	4	5	4	4	5	4	5	3	3	3	5	3	1	1	4	4	4	4	2	1	1	1	3	3	4	4	3	2	1	1
10	3	1	3	3	4	5	4	3	3	4	4	3	3	4	3	2	2	2	3	2	4	3	2	2	2	2	2	2	2	2	3	1	1	3	3	2	2	1	1	3	2	1	1	1	1	4	2	3	1
10	3	2	2	1	2	2	5	12	3	5	5	5	5	5	5	5	3	3	5	3	5	3	3	4	3	5	5	5	3	5	3	1	1	4	4	4	4	1	1	2	2	4	4	4	4	4	4	2	2
9	3	2	1	3	2	2	5	4	3	5	2	2	1	1	1	1	3	4	3	5	3	1	1	2	1	2	5	3	5	4	5	2	2	1	1	2	2	1	4	1	1	2	2	1	1	4	4	4	4
10	3	1	1	1	3	2	4	3	3	5	5	1	3	5	5	1	5	5	5	5	4	4	1	2	2	5	5	5	5	5	5	1	1	4	4	4	4	2	2	4	4	4	4	4	4	1	1	1	1
10	3	2	1	4	4	4	8	5	3	3	3	3	2	5	5	4	5	5	4	4	5	4	4	3	4	4	5	5	5	4	5	4	2	4	2	4	4	4	4	1	1	3	1	4	1	1	1	4	1
10	3	2	2	2	3	3	9	5	3	5	4	5	4	5	4	5	5	5	5	1	4	5	4	5	4	5	5	5	5	4	5	1	1	4	4	4	4	3	3	1	1	1	1	4	4	1	1	1	1
9	3	1	5	1	4	3	10	5	4	5	3	5	4	3	4	5	3	3	4	3	3	3	2	3	1	3	2	4	2	5	2	4	2	4	4	4	3	3	4	2	4	1	1	4	4	1	1	3	4
10	3	2	4	4	5	5	10	5	5	5	5	4	5	5	4	5	5	4	4	3	5	3	3	4	2	4	5	5	5	4	5	1	1	3	3	4	4	1	1	2	1	4	4	4	4	3	3	1	1
10	3	2	5	4	4	4	10	4	2	4	5	3	5	5	4	5	5	5	5	3	4	2	2	3	1	2	5	5	5	4	5	2	2	3	3	4	4	3	2	1	1	2	2	4	4	3	2	1	1
10	3	2	4	4	4	5	5	4	3	2	3	2	3	4	2	3	3	2	2	3	2	2	2	2	2	3	2	3	3	3	3	2	1	3	3	3	3	2	2	1	1	2	2	3	3	2	3	1	1
10	3	1	3	4	5	5	12	5	5	5	5	5	5	4	3	1	3	5	5	1	5	5	5	5	5	5	5	5	5	5	5	4	4	4	4	4	4	4	4	4	4	4	4	4	4	3	3	1	1
10	3	2	3	3	3	3	12	5	4	5	4	3	5	5	5	5	4	4	5	5	3	5	5	5	5	5	5	5	5	5	5	2	1	4	4	4	4	1	1	4	4	4	4	4	4	1	1	2	1
10	3	2	3	1	4	3	7	3	5	5	5	5	3	5	5	5	5	5	5	5	5	3	2	5	5	5	4	4	5	5	5	2	4	4	4	4	4	1	4	1	1	4	4	3	4	4	2	4	4
10	3	2	2	1	3	3	8	3	5	3	5	2	4	5	5	4	1	5	5	3	5	3	5	5	5	5	4	5	4	3	4	1	1	4	4	4	4	2	1	1	1	2	2	1	1	2	2	3	3
10	3	1	4	4	2	3	6	2	5	5	3	5	1	2	1	2	2	3	2	3	2	4	1	2	1	3	2	2	3	1	2	1	2	2	1	3	2	3	1	2	2	2	1	3	3	4	4	1	1
10	3	1	4	4	5	4	12	5	4	5	4	5	3	5	1	5	4	5	5	4	5	5	5	5	3	5	2	5	4	5	5	1	2	4	3	4	3	1	4	4	4	4	4	4	4	1	1	2	1
10	3	1	3	5	5	5	6	5	5	5	4	4	5	3	5	4	4	3	5	1	2	5	5	5	5	5	4	5	5	1	5	4	4	4	1	4	3	3	4	2	2	4	1	4	3	4	4	4	1
10	3	1	3	3	5	4	4	3	3	3	4	5	3	4	2	4	3	2	1	1	5	5	5	4	4	3	5	3	4	3	4	3	2	3	2	3	2	4	1	2	4	3	4	4	4	2	3	1	2
10	3	1	2	3	3	3	8	3	5	5	5	3	5	5	5	5	5	5	5	5	5	3	4	4	5	5	5	5	5	5	5	1	1	4	4	4	4	1	1	4	4	3	3	3	3	1	1	4	4
9	3	2	3	1	5	5	11	5	5	5	3	3	5	5	5	5	5	5	5	5	4	5	3	3	2	4	5	5	5	5	5	1	1	4	4	4	4	3	3	4	4	4	4	4	4	2	2	3	2
10	3	1	4	5	5	5	10	5	5	4	4	3	4	5	5	5	4	5	5	4	5	3	4	3	2	5	4	5	4	5	3	1	1	4	4	4	4	2	1	1	1	1	4	4	1	1	1	1	3
10	3	1	3	3	3	4	9	5	4	5	4	4	4	4	3	4	3	5	4	3	5	4	4	4	4	4	5	4	4	4	4	3	2	4	3	4	3	3	4	4	1	2	1	4	1	4	4	2	4
9	3	2	4	4	4	4	11	5	5	5	5	5	5	5	5	5	5	5	5	5	5	5	5	5	4	5	5	5	5	5	5	1	2	3	4	4	4	1	2	3	4	4	4	4	4	3	4	2	3
9	3	1	4	4	4	3	12	4	3	4	2	4	3	3	2	4	5	4	4	3	3	3	3	2	4	3	3	4	3	4	5	2	2	3	3	4	4	2	1	2	2	1	1	2	4	2	2	3	3
9	3	2	1	1	4	1	8	4	5	5	5	5	3	5	1	1	4	2	4	5	5	5	5	5	5	5	5	5	5	5	5	2	1	4	4	4	4	2	2	1	1	1	1	4	4	1	1	3	3
9	3	1	4	4	4	4	9	5	3	1	3	4	1	2	5	1	2	3	3	2	4	5	5	1	5	5	5	5	5	5	5	3	3	4	4	4	4	3	2	4	2	4	1	4	1	3	1	3	2
9	3	1	4	4	4	4	7	3	3	4	1	1	1	4	4	4	3	3	3	4	3	1	1	3	1	1	1	3	3	2	2	3	2	2	2	3	1	2	4	1	1	1	1	2	2	2	4	2	2
9	3	2	1	1	3	3	7	4	5	5	2	2	5	2	5	5	5	2	5	4	5	5	2	5	2	3	5	5	5	4	5	1	1	3	3	4	4	1	1	1	2	2	1	1	1	2	1	1	1
8	3	1	4	3	5	4	9	4	3	4	3	2	2	2	2	3	3	2	2	3	3	4	4	3	3	2	2	3	2	4	2	2	2	3	3	2	3	3	3	3	3	3	3	3	3	2	3	4	4
9	3	1	3	3	5	4	11	4	4	5	5	5	3	4	4	5	2	2	2	5	3	5	5	5	5	5	5	2	3	1	1	4	4	4	4	4	4	4	4	4	4	4	4	2	1	3	1	4	2
10	3	2	3	1	4	4	11	5	4	5	3	4	4	5	5	4	3	5	5	5	3	3	3	4	4	3	5	4	4	5	4	1	1	4	4	4	4	1	1	3	3	4	3	4	4	2	2	2	2
8	3	2	5	5	5	5	12	4	5	4	5	5	5	5	5	5	5	5	4	5	5	5	3	5	5	5	5	5	5	5	5	3	3	4	4	4	4	1	2	4	4	3	3	4	4	2	2	2	2
8	3	1	5	4	4	4	8	5	2	4	1	2	4	5	1	5	5	5	3	1	1	5	5	5	5	5	5	5	5	5	5	1	1	4	3	4	1	1	2	2	1	2	2	4	1	1	1	1	1
9	3	2	1	5	4	5	12	5	4	5	5	4	5	5	5	2	4	4	5	5	5	4	4	4	2	5	5	5	5	5	5	4	2	3	4	4	4	4	3	3	3	4	1	3	4	4	4	3	3
10	3	2	4	4	4	3	9	4	3	5	4	3	1	1	1	2	2	5	3	4	4	3	2	3	4	4	5	2	5	5	5	4	3	4	4	4	4	1	1	3	4	4	4	4	3	4	4	4	1
9	3	1	5	5	3	3	8	3	5	5	5	4	5	5	5	5	5	5	5	5	5	4	5	5	4	5	5	5	5	5	5	3	2	4	4	4	4	2	2	4	4	3	3	4	4	2	2	3	3
8	3	2	5	5	4	5	9	5	3	4	2	4	4	2	2	3	3	5	4	3	4	3	2	4	1	3	3	4	4	2	5	1	2	2	2	4	3	1	1	2	3	3	2	4	3	1	1	2	1
8	3	1	4	4	4	4	12	5	5	5	5	5	5	5	4	4	5	5	4	5	5	5	5	5	5	5	5	5	5	5	5	4	4	4	4	4	4	4	4	4	4	4	4	4	3	4	4	4	3
10	3	1	4	4	4	4	12	5	4	5	5	4	5	3	4	5	3	3	4	4	4	5	5	4	3	4	4	5	4	5	4	3	3	4	4	2	4	2	2	2	2	3	3	4	4	2	2	4	4
9	3	1	2	1	4	4	12	5	5	5	5	4	3	4	2	1	1	4	5	4	4	3	1	1	1	4	1	4	1	5	5	2	4	3	4	4	2	1	1	4	1	3	3	3	1	4	4	4	1
8	3	1	1	3	1	1	12	4	2	5	5	3	1	1	5	4	3	3	1	3	3	3	4	3	3	3	3	2	1	3	2	1	2	1	4	1	4	3	2	4	4	1	2	2	2	1	1	3	4
11	4	2	3	3	4	4	7	4	4	5	4	4	4	5	5	4	4	5	5	4	5	5	4	4	4	4	5	5	5	5	5	1	1	3	3	4	4	1	1	1	1	2	2	4	4	1	1	2	2
10	4	2	4	4	3	3	11	3	4	4	3	2	3	5	5	4	4	4	4	3	4	4	4	4	3	3	4	4	5	3	4	2	2	4	4	4	4	1	1	4	4	2	2	4	4	2	2	2	2
11	4	1	1	2	2	1	6	4	2	5	4	3	2	5	4	5	3	5	5	1	5	4	3	5	4	5	5	5	4	5	5	1	1	4	4	4	4	1	1	3	2	1	1	4	4	4	4	1	1
10	4	2	4	4	4	3	8	4	4	5	4	2	4	4	2	5	5	5	5	2	4	2	1	1	1	2	3	3	3	2	2	2	3	3	2	3	3	1	2	2	1	2	2	2	2	2	2	1	2
10	4	2	2	3	5	2	7	4	4	5	4	5	5	5	3	5	5	4	4	2	3	5	3	5	1	5	5	5	5	5	5	2	3	3	2	3	3	1	1	4	4	1	1	2	2	4	4	1	1
10	4	2	4	4	4	4	9	3	5	5	5	5	5	5	5	5	5	5	5	2	5	2	2	5	2	5	5	4	5	5	5	1	1	4	4	4	4	2	1	3	3	4	4	4	4	1	1	2	3
11	4	2	5	5	5	4	9	4	5	5	5	4	5	4	4	5	5	5	5		5	5	5	5	4	5	5	4	5	4	5	2	2	4	4	4	4	1	1	4	4	4	4	4	4	1	1	1	1
10	4	1	1	4	4	4	7	3	5	5	5	5	4	4	4	4	4	4	3	4	5	4	4	4	3	3	2	2	2	5	5	1	1	4	4	4	4	4	4	2	2	2	2	4	4	4	4	4	4
10	4	2	4	5	4	4	11	5	5	3	4	3	4	5	5	5	5	5	4	4	5	4	3	4	3	3	5	5	5	5	5	1	1	4	4	4	4	1	2	3	4	4	4	4	4	1	1	1	1
10	4	2	1	4	2	4	11	5	5	5	5	5	5	4	4	5	5	5	5	5	3	5	5	5	4	5	5	5	5	5	5	1	4	4	1	4	1	3	1	4	1	3	1	4	1	3	1	4	1
9	4	2	4	4	4	4	11	4	4	4	4	2	4	3	5	2	4	4	4	5	5	3	3	5	3	4	4	5	5	4	5	2	3	4	3	4	3	2	3	1	2	3	3	4	3	4	4	4	2
10	4	2	3	3	4	3	10	3	1	2	4	3	5	5	5	4	5	4	4	1	5	1	2	4	2	3	4	3	5	5	4	1	2	4	4	4	4	2	3	3	2	3	3	3	3	3	1	1	4
10	4	2	4	5	4	4	9	4	5	5	5	5	5	5	5	5	5	5	5	3	5	5	5	5	5	4	5	5	5	5	5	1	1	4	4	4	4	2	3	4	4	4	4	4	4	1	1	4	4
10	4	2	5	4	4	4	12	4	2	5	5	3	1	1	1	3	4	3	3	5	4	2	2	3	1	2	5	4	5	5	5	2	2	3	3	3	2	3	1	4	4	4	4	2	3	2	1	4	4
10	4	1	5	4	4	3	10	4	3	5	5	4	3	5	4	3	5	4	5	1	5	3	3	4	2	5	3	4	3	5	4	4	3	3	4	4	4	4	2	2	3	2	4	1	3	2	3	3	1
10	4	1	4	3	4	4	12	5	3	5	4	2	4	3	3	2	5	5	5	5	5	5	5	5	4	5	5	5	5	4	5	3	1	3	2	4	2	4	4	2	4	4	3	1	1	4	4	3	1
10	4	2	2	2	3	3	8	3	5	5	5	5	1	3	5	4	5	5	5	1	4	5	5	5	4	5	5	5	5	5	5	1	1	4	4	4	4	1	1	4	4	4	4	3	1	3	3	4	1
11	4	1	3	4	4	3	8	3	5	5	5	5	2	5	2	3	5	3	5	1	3	4	3	1	1	5	5	5	5	5	5	4	2	4	4	4	4	2	2	1	1	3	3	4	1	1	1	4	4
9	4	1	4	4	3	3	10	3	4	5	5	3	5	4	4	5	4	4	5	5	5	5	4	5	3	4	4	5	4	4	4	2	2	3	3	3	3	1	1	3	1	3	4	3	4	4	2	4	4
11	4	1	3	5	3	2	7	4	5	5	5	5	4	5	5	5	5	5	4	4	3	5	5	5	5	5	5	5	5	5	5	2	1	4	3	4	3	2	1	1	2	3	2	4	4	1	1	2	2
9	4	2	5	4	4	4	12	4	3	5	4	4	4	5	5	4	5	5	5	5	5	5	5	4	4	5	5	5	5	5	5	2	2	3	3	4	4	1	1	4	4	4	4	4	4	3	3	2	2
11	4	2	3	4	4	4	7	4	3	4	5	5	2	3	5	5	5	3	5	3	5	3	5	5	2	5	5	5	5	5	5	2	2	4	4	4	4	3	3	4	4	2	2	2	1	2	1	1	1
10	4	1	3	4	4	4	8	4	5	5	5	4	5	5	5	5	5	5	5	5	5	3	5	5	3	2	5	5	5	5	5	1	1	4	4	4	4	1	1	4	4	4	4	4	4	2	2	2	1
11	4	1	4	4	4	4	12	4	5	5	5	5	4	5	5	4	5	5	5	5	5	5	5	5	4	5	5	5	5	5	5	2	1	4	3	4	4	2	2	3	3	4	2	4	3	2	4	4	4
11	4	2	4	1	4	4	10	4	4	4	5	3	5	5	4	5	5	5	5	4	5	3	4	4	3	5	5	5	5	5	5	1	1	4	4	4	4	1	1	3	3	2	4	4	4	1	1	1	2
10	4	2	4	1	4	3	11	3	5	5	5	5	4	5	5	4	5	5	5	5	5	5	5	5	4	5	4	5	5	5	5	2	1	4	4	4	4	2	1	4	4	4	4	4	4	2	2	2	1
11	4	2	3	4	5	5	9	5	5	5	5	5	5	5	5	5	5	5	5	5	5	5	4	4	4	4	4	4	4	4	5	3	3	3	3	4	4	2	2	4	4	4	4	4	4	2	2	3	3
10	4	1	5	3	4	4	5	3	4	5	5	5	4	5	5	5	4	4	5	5	5	4	4	3	3	4	5	5	5	5	5	3	3	4	4	4	4	3	3	3	3	3	3	4	4	2	2	1	4
[truncated: 288 more columns]
